# Supplementary material for: Predicting groundwater recharge for varying land cover and climate conditions – a global meta-study
Source: Copernicus journal article supplement (doi:10.5194/hess-22-2689-2018), 2018-05-07
Supplement: Supplementary file 1 [file hess-22-2689-2018-supplement.zip]

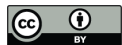

## *Supplement of*

# **Predicting groundwater recharge for varying land cover and climate conditions – a global meta-study**

**Chinchu Mohan et al.**

*Correspondence to:* Chinchu Mohan (mohanc@student.unimelb.edu.au)

- [hess-22-2689-2018-supplement-title-page.pdf](#)
- Supplements
  - [Figure\\_S1.docx](#)
  - [Supplement data.xlsx](#)

The copyright of individual parts of the supplement might differ from the CC BY 4.0 License.
